# Supplementary material for: Incorporation of Coumarin 6 in cyclodextrins: microcrystals to lamellar composites
Source: Royal Society of Chemistry journal article supplement (doi:10.1039/c4ra13706j), 2014-12-09
Supplement: c4ra13706j1.pdf [file c4ra13706j1.pdf]

## Electronic Supplementary Information

### Incorporation of Coumarin 6 in cyclodextrins: Microcrystals to lamellar composites

Prasun Ghosh, Tarasankar Das, Arnab Maity, Somen Mondal and Pradipta Purkayastha\*

**Materials.** C6 and CDs were bought from Sigma-Aldrich, WI, USA and used as received. Stock solution of the dye was prepared in methanol. Final concentration ( $0.7 \times 10^{-3}$  M) of this stock solution was calculated from its absorption spectrum. Concentration of the experimental solutions, prepared in different solvents using 1% of the methanol stock, was  $1 \times 10^{-6}$  M. Double distilled water was used throughout the experiments.

**Measurements.** The absorption spectra were recorded using a Varian Cary 300 Bio UV-vis spectrophotometer. Fluorescence measurements were performed using a Horiba Jobin Yvon Fluoromax3 spectrofluorimeter. The fluorescence lifetimes were measured by the method of time-correlated single-photon counting using a picosecond spectrofluorimeter from Horiba Jobin Yvon, IBH. The instrument was equipped with FluoroHub single photon counting controller, Fluoro3PS precision photomultiplier power supply, and FC-MCP-50SC MCP-PMT detection unit. A laser head or a nano-LED pulsed diode powered by a pulsed diode controller (IBH) was used as the excitation light source. The excitation wavelength was 402 nm. The typical response time of this laser head was  $<100$  ps. To calculate the lifetime, the fluorescence decay curves were analyzed by an iterative fitting program, DAS6, provided by IBH. For the AFM studies an NT-MDT NTEGRA instrument procured from NT-MDT, CA, USA was used. FESEM images were recorded in Carl Zeiss SUPRA 55VP FESEM. The epifluorescence images were taken using a LSM 710 with microscope axio observer Z.1, Carl Zeiss.

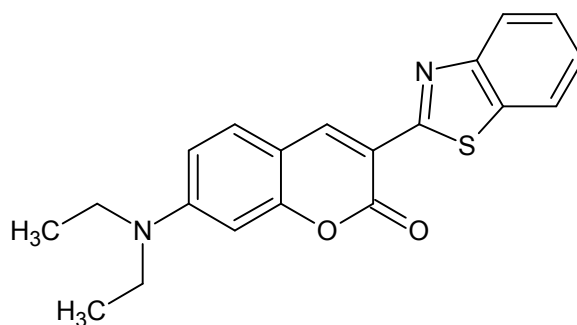

**Fig. S1** Molecular structure of Coumarin 6 (C6).

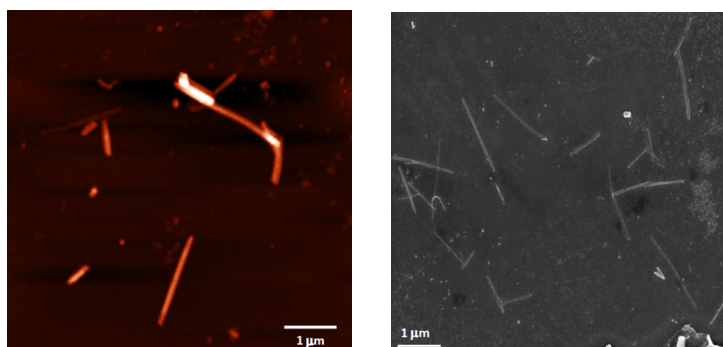

**Fig. S2** Atomic force and scanning electron micrographs of C6 after incubation in water (with 1% methanol) for 30 minutes at room temperature. The final concentration of C6 was 1 μM.

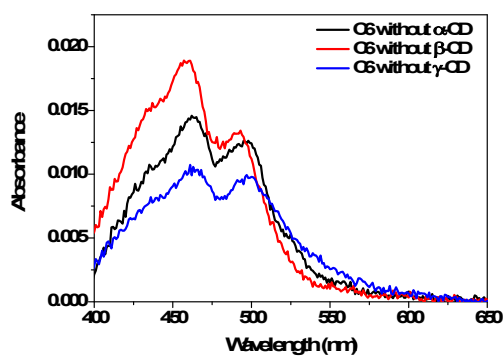

**Fig. S3** Absorption spectra of C6 in absence of CDs. Three different blank 1 μM C6 solutions were prepared for each set of experiments. The difference in absorbance may be due to slight variation in settling time leading to formation of different extents of C6 microcrystals.

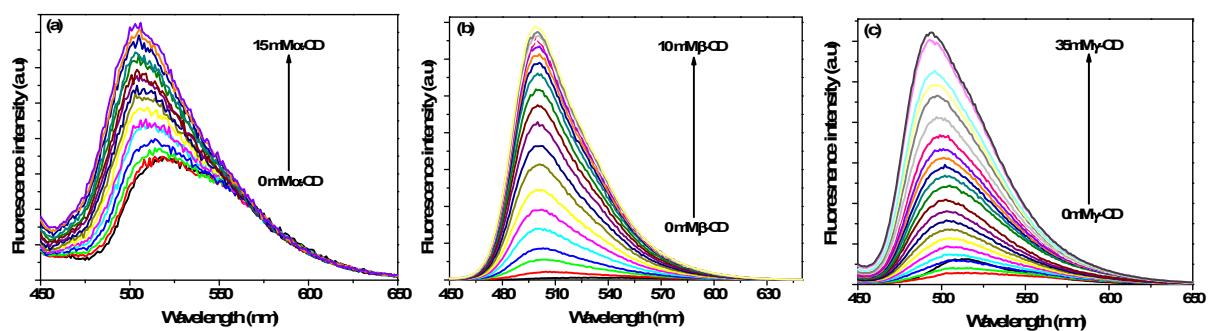

**Fig. S4** Fluorescence spectra of C6 in (a)  $\alpha$ -, (b)  $\beta$ - and (c)  $\gamma$ -CDs in aqueous environment.

The samples were excited at 430 nm.

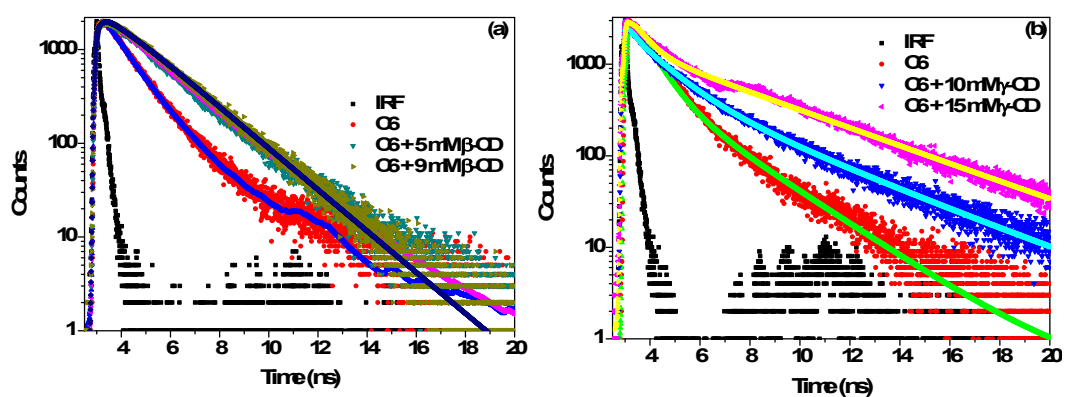

**Fig. S5** Time resolved fluorescence decay profile for C6 in presence of (a)  $\beta$ - and (b)  $\gamma$ -CDs in aqueous environment. The samples were excited at 402 nm and the emissions at 525 nm were monitored.
